# Supplementary material for: Statin prescribing for people with severe mental illnesses: a staggered cohort study of ‘real-world’ impacts
Source: PubMed Central journal article supplement (PMC5353294; doi:10.1136/bmjopen-2016-013154), 2017-03-07
Supplement: bmjopen-2016-013154supp4.pdf [file bmjopen-2016-013154supp4.pdf]

## Regression model outputs

**Table 1: Output from multivariable logistic regression model for associations between covariates and either statin prescribing or CVD events in complete cases**

| COMPLETE CASES    |                  | Statin Prescribing |        |      | CVD events |        |       |
|-------------------|------------------|--------------------|--------|------|------------|--------|-------|
|                   |                  | OR                 | 95% CI |      | OR         | 95% CI |       |
| Age band          | 40-44            | 1.00               | --     | --   | 1.00       | --     | --    |
|                   | 45-49            | 0.97               | 0.75   | 1.24 | 3.64       | 1.66   | 7.95  |
|                   | 50-54            | 1.54               | 1.22   | 1.96 | 3.81       | 1.76   | 8.28  |
|                   | 55-59            | 1.98               | 1.56   | 2.53 | 4.82       | 2.24   | 10.36 |
|                   | 60-64            | 1.93               | 1.50   | 2.48 | 5.87       | 2.73   | 12.64 |
|                   | 65-69            | 2.19               | 1.66   | 2.87 | 8.43       | 3.92   | 18.13 |
|                   | 70-74            | 1.85               | 1.35   | 2.52 | 10.80      | 4.94   | 23.64 |
|                   | 75-79            | 2.04               | 1.42   | 2.93 | 9.74       | 4.21   | 22.57 |
|                   | 80-84            | 0.96               | 0.59   | 1.57 | 11.45      | 4.61   | 28.40 |
| Sex               | Male             | 1.00               | --     | --   | 1.00       | --     | --    |
|                   | Female           | 0.55               | 0.48   | 0.63 | 0.73       | 0.57   | 0.93  |
|                   | Diabetes         | 5.11               | 4.42   | 5.90 | 1.29       | 1.00   | 1.66  |
|                   | Cholesterol      | 2.59               | 2.43   | 2.77 | 1.08       | 0.98   | 1.20  |
|                   | Systolic BP      | 1.01               | 1.01   | 1.02 | 1.02       | 1.01   | 1.03  |
|                   | BMI              | 1.03               | 1.02   | 1.04 | 1.01       | 0.99   | 1.03  |
| Smoking status    | Never            | 1.00               | --     | --   | 1.00       | --     | --    |
|                   | Ex               | 1.20               | 0.97   | 1.49 | 1.36       | 0.96   | 1.94  |
|                   | Current          | 1.75               | 1.50   | 2.04 | 1.33       | 1.00   | 1.77  |
| SMI type          | Bipolar          | 1.00               | --     | --   | 1.00       | --     | --    |
|                   | Schizophrenia    | 1.00               | 0.86   | 1.16 | 0.96       | 0.73   | 1.26  |
| Cohort            | 2002/3           | 1.00               | --     | --   | 1.00       | --     | --    |
|                   | 2004/5           | 2.18               | 1.64   | 2.89 | 0.68       | 0.47   | 0.98  |
|                   | 2006/7           | 2.29               | 1.74   | 3.00 | 0.52       | 0.36   | 0.75  |
|                   | 2008/9           | 1.75               | 1.33   | 2.30 | 0.33       | 0.22   | 0.50  |
|                   | 2009/10          | 1.16               | 0.89   | 1.53 | 0.16       | 0.10   | 0.25  |
| Consultation rate | <4               | 1.00               | --     | --   | 1.00       | --     | --    |
|                   | 4-6              | 1.14               | 0.89   | 1.47 | 1.23       | 0.73   | 2.08  |
|                   | 7-12             | 1.26               | 0.99   | 1.60 | 1.26       | 0.77   | 2.07  |
|                   | >12              | 1.38               | 1.08   | 1.76 | 1.40       | 0.85   | 2.30  |
| Antipsychotic     | None             | 1.00               | --     | --   | 1.00       | --     | --    |
|                   | 1                | 0.95               | 0.80   | 1.13 | 0.95       | 0.70   | 1.28  |
|                   | 2                | 0.97               | 0.83   | 1.12 | 0.97       | 0.73   | 1.28  |
| Townsend quintile | 1                | 1.00               | --     | --   | 1.00       | --     | --    |
|                   | 2                | 0.99               | 0.79   | 1.24 | 1.09       | 0.73   | 1.63  |
|                   | 3                | 1.01               | 0.82   | 1.26 | 1.56       | 1.07   | 2.27  |
|                   | 4                | 0.93               | 0.75   | 1.15 | 1.05       | 0.71   | 1.55  |
|                   | 5                | 1.16               | 0.93   | 1.44 | 1.00       | 0.66   | 1.50  |
|                   | Antihypertensive | 1.52               | 1.31   | 1.75 | 0.86       | 0.66   | 1.10  |
|                   | Antidepressant   | 1.23               | 1.07   | 1.40 | 1.63       | 1.29   | 2.08  |
|                   | Mood stabiliser  | 0.86               | 0.73   | 1.00 | 1.07       | 0.81   | 1.42  |

| COMPLETE CASES | Statin Prescribing |        |       | CVD events |        |      |
|----------------|--------------------|--------|-------|------------|--------|------|
|                | OR                 | 95% CI |       | OR         | 95% CI |      |
| Asthma         | 1.09               | 0.89   | 1.34  | 1.37       | 0.96   | 1.94 |
| COPD           | 1.09               | 0.78   | 1.51  | 2.35       | 1.55   | 3.56 |
| FH             | 10.27              | 7.09   | 14.87 | 1.16       | 0.66   | 2.03 |
| AF             | 0.98               | 0.52   | 1.84  | 0.58       | 0.17   | 1.94 |
| Cancer         | 0.61               | 0.36   | 1.04  | 0.65       | 0.26   | 1.65 |
| Hypothyroidism | 0.99               | 0.55   | 1.80  | 0.48       | 0.11   | 2.05 |
| CKD            | 0.87               | 0.67   | 1.13  | 1.22       | 0.79   | 1.87 |
| Heavy drinking | 0.77               | 0.64   | 0.92  | 0.59       | 0.40   | 0.86 |
| Non statin use | 1.11               | 0.68   | 1.82  | 0.97       | 0.38   | 2.49 |

**Table 2: Output from multivariable logistic regression model for associations between covariates and either statin prescribing or CVD events in the full dataset (with imputed values)**

| IMPUTED DATA      | Statin Prescribing |        |      | CVD events |        |      |       |
|-------------------|--------------------|--------|------|------------|--------|------|-------|
|                   | OR                 | 95% CI |      | OR         | 95% CI |      |       |
| Age band          | 40-44              | 1.00   | --   | --         | 1.00   | --   | --    |
|                   | 45-49              | 1.18   | 0.98 | 1.42       | 2.00   | 1.57 | 2.56  |
|                   | 50-54              | 1.66   | 1.40 | 1.98       | 2.47   | 1.94 | 3.15  |
|                   | 55-59              | 2.11   | 1.77 | 2.51       | 3.21   | 2.53 | 4.07  |
|                   | 60-64              | 2.41   | 2.01 | 2.88       | 4.43   | 3.49 | 5.61  |
|                   | 65-69              | 2.71   | 2.24 | 3.28       | 6.18   | 4.87 | 7.85  |
|                   | 70-74              | 2.30   | 1.85 | 2.85       | 7.64   | 5.97 | 9.77  |
|                   | 75-79              | 1.78   | 1.39 | 2.28       | 7.05   | 5.42 | 9.16  |
|                   | 80-84              | 0.98   | 0.70 | 1.37       | 7.82   | 5.89 | 10.38 |
| Sex               | Male               | 1.00   | --   | --         | 1.00   | --   | --    |
|                   | Female             | 0.56   | 0.50 | 0.61       | 0.71   | 0.64 | 0.79  |
|                   | Diabetes           | 7.20   | 6.49 | 7.99       | 1.31   | 1.13 | 1.51  |
|                   | Cholesterol        | 2.25   | 2.15 | 2.36       | 1.06   | 1.00 | 1.13  |
|                   | Systolic BP        | 1.01   | 1.01 | 1.02       | 1.01   | 1.01 | 1.01  |
|                   | BMI                | 1.04   | 1.04 | 1.05       | 1.01   | 1.00 | 1.02  |
| Smoking status    | Never              | 1.00   | --   | --         | 1.00   | --   | --    |
|                   | Ex                 | 1.27   | 1.10 | 1.47       | 1.12   | 0.96 | 1.30  |
|                   | Current            | 1.58   | 1.41 | 1.76       | 1.38   | 1.23 | 1.54  |
| SMI type          | Bipolar            | 1.00   | --   | --         | 1.00   | --   | --    |
|                   | Schizophrenia      | 1.01   | 0.91 | 1.13       | 0.83   | 0.74 | 0.93  |
| Cohort            | 2002/3             | 1.00   | --   | --         | 1.00   | --   | --    |
|                   | 2004/5             | 2.12   | 1.78 | 2.53       | 0.71   | 0.63 | 0.81  |
|                   | 2006/7             | 2.84   | 2.39 | 3.37       | 0.48   | 0.42 | 0.56  |
|                   | 2008/9             | 2.49   | 2.09 | 2.97       | 0.33   | 0.28 | 0.38  |
|                   | 2009/10            | 2.15   | 1.80 | 2.57       | 0.15   | 0.13 | 0.19  |
| Consultation rate | <4                 | 1.00   | --   | --         | 1.00   | --   | --    |
|                   | 4-6                | 1.79   | 1.53 | 2.11       | 1.01   | 0.87 | 1.17  |
|                   | 7-12               | 2.34   | 2.00 | 2.73       | 1.10   | 0.96 | 1.27  |

| IMPUTED DATA      |                  | Statin Prescribing |        |       | CVD events |        |      |
|-------------------|------------------|--------------------|--------|-------|------------|--------|------|
|                   |                  | OR                 | 95% CI |       | OR         | 95% CI |      |
|                   | >12              | 2.87               | 2.46   | 3.35  | 1.10       | 0.95   | 1.27 |
| Antipsychotic     | None             | 1.00               | --     | --    | 1.00       | --     | --   |
|                   | 1                | 0.94               | 0.84   | 1.06  | 1.01       | 0.89   | 1.14 |
|                   | 2                | 1.11               | 1.00   | 1.23  | 1.05       | 0.94   | 1.18 |
| Townsend quintile | 1                | 1.00               | --     | --    | 1.00       | --     | --   |
|                   | 2                | 0.96               | 0.82   | 1.12  | 1.21       | 1.03   | 1.42 |
|                   | 3                | 1.01               | 0.87   | 1.18  | 1.41       | 1.21   | 1.65 |
|                   | 4                | 0.91               | 0.78   | 1.06  | 1.22       | 1.04   | 1.43 |
|                   | 5                | 1.13               | 0.97   | 1.32  | 1.27       | 1.07   | 1.50 |
|                   | Antihypertensive | 2.35               | 2.12   | 2.60  | 1.31       | 1.17   | 1.47 |
|                   | Antidepressant   | 0.96               | 0.83   | 1.11  | 1.18       | 1.00   | 1.38 |
|                   | Mood stabiliser  | 1.04               | 0.83   | 1.31  | 1.15       | 0.93   | 1.43 |
|                   | Asthma           | 1.03               | 0.94   | 1.13  | 1.12       | 1.01   | 1.23 |
|                   | COPD             | 0.85               | 0.76   | 0.94  | 1.00       | 0.89   | 1.12 |
|                   | FH               | 38.39              | 28.99  | 50.83 | 1.42       | 0.95   | 2.12 |
|                   | AF               | 1.22               | 0.83   | 1.79  | 1.04       | 0.71   | 1.53 |
|                   | Cancer           | 0.64               | 0.43   | 0.94  | 0.69       | 0.46   | 1.02 |
|                   | Hypothyroidism   | 1.14               | 0.74   | 1.76  | 1.21       | 0.76   | 1.94 |
|                   | CKD              | 1.29               | 1.06   | 1.57  | 1.17       | 0.90   | 1.51 |
|                   | Heavy drinking   | 0.95               | 0.83   | 1.07  | 0.98       | 0.85   | 1.14 |
|                   | Non statin use   | 1.81               | 1.24   | 2.66  | 0.99       | 0.51   | 1.89 |

**Table 3: Analysis of complete case data in the main analysis.  
Estimates presented alongside imputed data results**

| Section of Main Analysis                             |                     | N=6915<br>Complete case<br>analysis |               |             | N=45824<br>Imputed data<br>analysis |               |             |
|------------------------------------------------------|---------------------|-------------------------------------|---------------|-------------|-------------------------------------|---------------|-------------|
| <b>VARIABLES IN THE ADJUSTED MODEL</b>               |                     | <b>IRR</b>                          | <b>95% CI</b> |             | <b>IRR</b>                          | <b>95% CI</b> |             |
| Impact of adding additional variables into the model | Crude               | 1.11                                | 0.78          | 1.58        | 1.39                                | 1.11          | 1.74        |
|                                                      | Age + Sex           | 1.06                                | 0.75          | 1.51        | 1.16                                | 0.93          | 1.46        |
|                                                      | Diabetes            | 1.01                                | 0.70          | 1.44        | 1.04                                | 0.82          | 1.31        |
|                                                      | Cholesterol         | 1.06                                | 0.72          | 1.56        | 0.98                                | 0.77          | 1.25        |
|                                                      | BMI                 | 1.03                                | 0.70          | 1.53        | 0.96                                | 0.75          | 1.22        |
|                                                      | Sys BP              | 0.99                                | 0.67          | 1.46        | 0.92                                | 0.72          | 1.18        |
|                                                      | Smoker              | 0.96                                | 0.65          | 1.42        | 0.89                                | 0.70          | 1.14        |
|                                                      | SMI type            | 0.96                                | 0.65          | 1.43        | 0.89                                | 0.70          | 1.14        |
|                                                      | Year                | 0.92                                | 0.62          | 1.37        | 0.92                                | 0.72          | 1.18        |
|                                                      | Fully adjusted*     | <b>0.88</b>                         | <b>0.58</b>   | <b>1.36</b> | <b>0.89</b>                         | <b>0.68</b>   | <b>1.15</b> |
| <b>COHORT-SPECIFIC ESTIMATES</b>                     |                     | <b>IRR</b>                          | <b>95% CI</b> |             | <b>IRR</b>                          | <b>95% CI</b> |             |
| Cohort (fully adjusted*)                             | 2002/3              | 0.41                                | 0.02          | 7.08        | 0.68                                | 0.35          | 1.32        |
|                                                      | 2004/5              | 0.91                                | 0.40          | 2.06        | 1.19                                | 0.75          | 1.88        |
|                                                      | 2006/7              | 0.98                                | 0.43          | 2.24        | 0.99                                | 0.58          | 1.69        |
|                                                      | 2008/9              | 0.71                                | 0.24          | 2.07        | 0.70                                | 0.35          | 1.41        |
|                                                      | 2010/11             | 2.70                                | 0.64          | 8.35        | 0.77                                | 0.26          | 2.31        |
| <b>PRIMARY OUTCOME</b>                               |                     | <b>IRR</b>                          | <b>95% CI</b> |             | <b>IRR</b>                          | <b>95% CI</b> |             |
| (fully adjusted*)                                    | MI and Stroke       | 0.88                                | 0.58          | 1.36        | 0.89                                | 0.68          | 1.15        |
| <b>SECONDARY OUTCOMES</b>                            |                     | <b>IRR</b>                          | <b>95% CI</b> |             | <b>IRR</b>                          | <b>95% CI</b> |             |
| (fully adjusted*)                                    | All-cause mortality | 1.02                                | 0.82          | 1.27        | 0.89                                | 0.78          | 1.02        |
|                                                      | Stroke              | 0.85                                | 0.49          | 1.48        | 0.96                                | 0.68          | 1.34        |
|                                                      | MI                  | 0.93                                | 0.47          | 1.83        | 0.75                                | 0.48          | 1.15        |
| <b>SUB-GROUP ANALYSES (fully adjusted*)</b>          |                     | <b>IRR</b>                          | <b>95% CI</b> |             | <b>IRR</b>                          | <b>95% CI</b> |             |
| SMI type                                             | Bipolar disorder    | 0.78                                | 0.38          | 1.61        | 0.89                                | 0.60          | 1.32        |
|                                                      | Schizophrenia       | 0.90                                | 0.53          | 1.52        | 0.85                                | 0.60          | 1.20        |
| Gender                                               | Men                 | 0.95                                | 0.53          | 1.72        | 0.96                                | 0.65          | 1.42        |
|                                                      | Women               | 0.86                                | 0.46          | 1.61        | 0.84                                | 0.58          | 1.20        |
| CVD risk strata                                      | ≥10%                | 0.96                                | 0.60          | 1.53        | 0.93                                | 0.69          | 1.26        |
|                                                      | ≥15%                | 1.03                                | 0.65          | 1.62        | 0.90                                | 0.67          | 1.21        |
|                                                      | ≥20%                | 1.00                                | 0.63          | 1.60        | 0.82                                | 0.59          | 1.13        |
|                                                      | ≥25%                | 0.91                                | 0.55          | 1.50        | 0.73                                | 0.52          | 1.05        |

\* Final model covariates (baseline): age and sex, diabetes, total cholesterol concentration, BMI, systolic blood pressure (Sys BP), smoking status, SMI type, cohort time period, antihypertensive use, antidepressant use, quartile of consultation rate, antipsychotic use and type, mood-stabiliser use, Townsend score, asthma, COPD, hypothyroidism, CKD, AF, familial hypercholesterolaemia, heavy drinking, non-statin lipid modification, cancer

**Table 4: Output from multivariable linear regression model for associations between statin prescribing and total cholesterol at 1 year after the index date (complete cases)**

| Factor                         |                         | Coefficient | Std. Err. | P>t    | 95% CI |       |
|--------------------------------|-------------------------|-------------|-----------|--------|--------|-------|
| <b>Statin prescription</b>     |                         | -1.29       | 0.03      | <0.001 | -1.35  | -1.23 |
| <b>Cholesterol at baseline</b> |                         | -0.36       | 0.01      | <0.001 | -0.39  | -0.34 |
| <b>Age band</b>                | <b>40-44</b>            | baseline    | --        | --     | --     |       |
|                                | <b>45-49</b>            | -0.05       | 0.04      | 0.26   | -0.13  | 0.04  |
|                                | <b>50-54</b>            | -0.05       | 0.04      | 0.25   | -0.13  | 0.03  |
|                                | <b>55-59</b>            | -0.02       | 0.05      | 0.70   | -0.11  | 0.07  |
|                                | <b>60-64</b>            | -0.06       | 0.05      | 0.17   | -0.15  | 0.03  |
|                                | <b>65-69</b>            | -0.13       | 0.05      | 0.01   | -0.23  | -0.03 |
|                                | <b>70-74</b>            | -0.11       | 0.06      | 0.05   | -0.22  | 0.00  |
|                                | <b>75-79</b>            | -0.20       | 0.07      | <0.001 | -0.33  | -0.07 |
|                                | <b>80-84</b>            | -0.13       | 0.08      | 0.10   | -0.27  | 0.02  |
| <b>Sex</b>                     | <b>Male</b>             | baseline    | --        | --     | --     |       |
|                                | <b>Female</b>           | 0.09        | 0.02      | <0.001 | 0.05   | 0.14  |
|                                | <b>Diabetes</b>         | -0.11       | 0.03      | <0.001 | -0.16  | -0.06 |
|                                | <b>Systolic BP</b>      | 0.00        | 0.00      | 0.17   | 0.00   | 0.00  |
|                                | <b>BMI</b>              | 0.00        | 0.00      | 0.05   | -0.01  | 0.00  |
| <b>Smoking status</b>          | <b>Never</b>            | baseline    | --        | --     | --     |       |
|                                | <b>Ex</b>               | -0.02       | 0.04      | 0.53   | -0.10  | 0.05  |
|                                | <b>Current</b>          | 0.02        | 0.03      | 0.51   | -0.04  | 0.07  |
| <b>SMI type</b>                | <b>Bipolar</b>          | baseline    | --        | --     | --     |       |
|                                | <b>Schizophrenia</b>    | -0.04       | 0.03      | 0.19   | -0.09  | 0.02  |
| <b>Cohort</b>                  | <b>2002/3</b>           | baseline    | --        | --     | --     |       |
|                                | <b>2004/5</b>           | -0.11       | 0.06      | 0.07   | -0.22  | 0.01  |
|                                | <b>2006/7</b>           | -0.11       | 0.06      | 0.05   | -0.23  | 0.00  |
|                                | <b>2008/9</b>           | -0.06       | 0.06      | 0.33   | -0.17  | 0.06  |
|                                | <b>2009/10</b>          | -0.05       | 0.06      | 0.34   | -0.16  | 0.06  |
| <b>Consultation rate</b>       | <b>&lt;4</b>            | baseline    | --        | --     | --     |       |
|                                | <b>4-6</b>              | 0.00        | 0.05      | 0.95   | -0.09  | 0.10  |
|                                | <b>7-12</b>             | -0.03       | 0.04      | 0.53   | -0.12  | 0.06  |
|                                | <b>&gt;12</b>           | -0.01       | 0.04      | 0.80   | -0.10  | 0.08  |
| <b>Antipsychotic</b>           | <b>None</b>             | baseline    | --        | --     | --     |       |
|                                | <b>1</b>                | -0.05       | 0.03      | 0.16   | -0.11  | 0.02  |
|                                | <b>2</b>                | -0.06       | 0.03      | 0.03   | -0.12  | -0.01 |
| <b>Townsend quintile</b>       | <b>1</b>                | baseline    | --        | --     | --     |       |
|                                | <b>2</b>                | -0.02       | 0.04      | 0.67   | -0.10  | 0.06  |
|                                | <b>3</b>                | -0.07       | 0.04      | 0.07   | -0.15  | 0.00  |
|                                | <b>4</b>                | -0.08       | 0.04      | 0.04   | -0.15  | 0.00  |
|                                | <b>5</b>                | -0.03       | 0.04      | 0.42   | -0.11  | 0.04  |
|                                | <b>Antihypertensive</b> | -0.05       | 0.03      | 0.06   | -0.10  | 0.00  |
|                                | <b>Antidepressant</b>   | 0.03        | 0.02      | 0.20   | -0.02  | 0.08  |
|                                | <b>Mood stabiliser</b>  | 0.03        | 0.03      | 0.33   | -0.03  | 0.08  |

| Factor          | Coefficient | Std. Err. | P>t    | 95% CI |       |
|-----------------|-------------|-----------|--------|--------|-------|
| Asthma          | 0.08        | 0.04      | 0.03   | 0.01   | 0.15  |
| COPD            | -0.03       | 0.05      | 0.53   | -0.14  | 0.07  |
| FH              | -0.06       | 0.07      | 0.42   | -0.21  | 0.09  |
| AF              | 0.00        | 0.12      | 1.00   | -0.24  | 0.24  |
| Cancer          | -0.05       | 0.11      | 0.67   | -0.26  | 0.17  |
| Hypothyroidism  | -0.24       | 0.10      | 0.02   | -0.44  | -0.04 |
| CKD             | -0.02       | 0.04      | 0.64   | -0.10  | 0.06  |
| Heavy drinking  | 0.04        | 0.03      | 0.22   | -0.02  | 0.10  |
| Non statin use  | 0.20        | 0.10      | 0.05   | 0.00   | 0.39  |
| Model intercept | 1.96        | 0.16      | <0.001 | 1.64   | 2.27  |

**Table 5: Output from multivariable linear regression model for associations between statin prescribing and total cholesterol at 2 years after the index date (complete cases)**

| Factor                  | Coefficient   | Std. Err. | P>t    | 95% CI |       |       |
|-------------------------|---------------|-----------|--------|--------|-------|-------|
| Statin prescription     | -1.19         | 0.04      | <0.001 | -1.26  | -1.12 |       |
| Cholesterol at baseline | -0.41         | 0.01      | <0.001 | -0.44  | -0.38 |       |
| Age band                | 40-44         | baseline  | --     | --     | --    |       |
|                         | 45-49         | -0.01     | 0.05   | 0.86   | -0.10 | 0.08  |
|                         | 50-54         | -0.04     | 0.05   | 0.36   | -0.13 | 0.05  |
|                         | 55-59         | -0.01     | 0.05   | 0.79   | -0.10 | 0.08  |
|                         | 60-64         | -0.02     | 0.05   | 0.73   | -0.11 | 0.08  |
|                         | 65-69         | -0.15     | 0.05   | 0.01   | -0.26 | -0.04 |
|                         | 70-74         | -0.19     | 0.06   | <0.001 | -0.31 | -0.08 |
|                         | 75-79         | -0.19     | 0.08   | 0.02   | -0.35 | -0.03 |
|                         | 80-84         | -0.28     | 0.08   | <0.001 | -0.44 | -0.12 |
| Sex                     | Male          | baseline  | --     | --     | --    |       |
|                         | Female        | 0.14      | 0.03   | <0.001 | 0.09  | 0.19  |
| Diabetes                | -0.14         | 0.03      | <0.001 | -0.20  | -0.08 |       |
| Systolic BP             | 0.00          | 0.00      | 0.03   | 0.00   | 0.00  |       |
| BMI                     | -0.01         | 0.00      | <0.001 | -0.01  | 0.00  |       |
| Smoking status          | Never         | baseline  | --     | --     | --    |       |
|                         | Ex            | -0.05     | 0.04   | 0.18   | -0.13 | 0.02  |
|                         | Current       | -0.06     | 0.03   | 0.05   | -0.12 | 0.00  |
| SMI type                | Bipolar       | baseline  | --     | --     | --    |       |
|                         | Schizophrenia | -0.03     | 0.03   | 0.27   | -0.09 | 0.03  |
| Cohort                  | 2002/3        | baseline  | --     | --     | --    |       |
|                         | 2004/5        | -0.08     | 0.07   | 0.26   | -0.23 | 0.06  |
|                         | 2006/7        | 0.03      | 0.07   | 0.69   | -0.11 | 0.17  |
|                         | 2008/9        | 0.04      | 0.07   | 0.57   | -0.10 | 0.18  |
|                         | 2009/10       | 0.13      | 0.07   | 0.07   | -0.01 | 0.26  |
| Consultation rate       | <4            | baseline  | --     | --     | --    |       |
|                         | 4-6           | 0.03      | 0.05   | 0.55   | -0.06 | 0.12  |

| Factor                   |                         | Coefficient | Std. Err. | P>t    | 95% CI |       |
|--------------------------|-------------------------|-------------|-----------|--------|--------|-------|
|                          | <b>7-12</b>             | 0.05        | 0.04      | 0.28   | -0.04  | 0.13  |
|                          | <b>&gt;12</b>           | 0.04        | 0.04      | 0.31   | -0.04  | 0.13  |
| <b>Antipsychotic</b>     | <b>None</b>             | baseline    | --        | --     | --     |       |
|                          | <b>1</b>                | -0.06       | 0.04      | 0.07   | -0.13  | 0.01  |
|                          | <b>2</b>                | -0.07       | 0.03      | 0.02   | -0.13  | -0.01 |
| <b>Townsend quintile</b> | <b>1</b>                | baseline    | --        | --     | --     |       |
|                          | <b>2</b>                | -0.01       | 0.04      | 0.78   | -0.10  | 0.07  |
|                          | <b>3</b>                | -0.12       | 0.04      | 0.01   | -0.20  | -0.04 |
|                          | <b>4</b>                | -0.06       | 0.04      | 0.12   | -0.14  | 0.02  |
|                          | <b>5</b>                | -0.07       | 0.04      | 0.09   | -0.15  | 0.01  |
|                          | <b>Antihypertensive</b> | -0.03       | 0.03      | 0.35   | -0.09  | 0.03  |
|                          | <b>Antidepressant</b>   | 0.02        | 0.03      | 0.51   | -0.03  | 0.07  |
|                          | <b>Mood stabiliser</b>  | -0.03       | 0.03      | 0.35   | -0.09  | 0.03  |
|                          | <b>Asthma</b>           | 0.10        | 0.04      | 0.02   | 0.02   | 0.19  |
|                          | <b>COPD</b>             | -0.09       | 0.06      | 0.13   | -0.22  | 0.03  |
|                          | <b>FH</b>               | 0.04        | 0.09      | 0.63   | -0.13  | 0.21  |
|                          | <b>AF</b>               | -0.08       | 0.10      | 0.43   | -0.27  | 0.11  |
|                          | <b>Cancer</b>           | 0.00        | 0.13      | 0.99   | -0.25  | 0.25  |
|                          | <b>Hypothyroidism</b>   | -0.03       | 0.14      | 0.84   | -0.31  | 0.25  |
|                          | <b>CKD</b>              | -0.03       | 0.04      | 0.54   | -0.11  | 0.06  |
|                          | <b>Heavy drinking</b>   | 0.04        | 0.04      | 0.30   | -0.03  | 0.11  |
|                          | <b>Non statin use</b>   | 0.08        | 0.09      | 0.37   | -0.09  | 0.25  |
|                          | <b>Model intercept</b>  | 2.05        | 0.17      | <0.001 | 1.71   | 2.39  |
